# Supplementary material for: Honokiol protects against epidural fibrosis by inhibiting fibroblast proliferation and extracellular matrix overproduction in rats post-laminectomy
Source: PubMed Central journal article supplement — Int J Mol Med. 2020 Oct 22;46(6):2057–68. doi: 10.3892/ijmm.2020.4765 (PMC7595651; doi:10.3892/ijmm.2020.4765), 2020-10-22
Supplement: Supplementary_Data.pdf [file Supplementary_Data.pdf]

Figure S1. Effect of honokiol on the survival rate of rats post-laminectomy. Kaplan-Meier survival curves of rats treated with honokiol, and no rat death was observed in all groups until the rats were sacrificed.

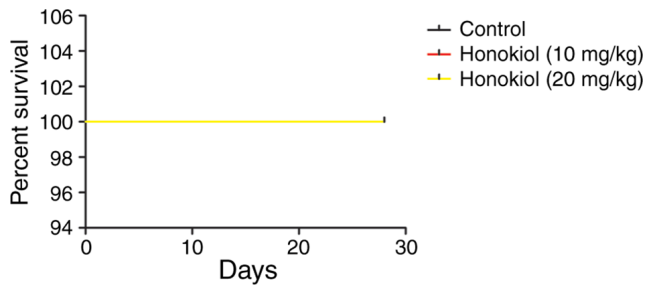

Table SI. Effects of honokiol (10 and 20 mg/kg administered intragastrically every other day for 4 weeks) on hepatotoxicity indices.

| Groups              | ALT (IU/l) | AST (IU/l) | Albumin (g/dl) |
|---------------------|------------|------------|----------------|
| Control             | 23.87±0.76 | 51.33±0.78 | 3.13±0.18      |
| Honokiol (10 mg/kg) | 25.10±0.78 | 51.97±1.00 | 3.07±0.11      |
| Honokiol (20 mg/kg) | 25.74±0.69 | 53.36±1.07 | 2.84±0.22      |

Data are represented as the means ± SEM (n=15). No significant differences were observed compared with the (control) or (honokiol 10 or 20 mg/kg) group at P>0.05 using one-way ANOVA followed by the Tukey-Kramer as post hoc test. ALT, alanine aminotransferase; AST, aspartate aminotransferase.
